# Supplementary material for: PID/WAG-mediated phosphorylation of the Arabidopsis PIN3 auxin transporter mediates polarity switches during gravitropism
Source: PubMed Central journal article supplement (PMC6035267; doi:10.1038/s41598-018-28188-1), 2018-07-06
Supplement: 41598_2018_28188_MOESM1_ESM.pdf [file 41598_2018_28188_MOESM1_ESM.pdf]

***PID/WAG-mediated phosphorylation of the Arabidopsis PIN3 auxin transporter mediates polarity switches during gravitropism***

Peter Grones<sup>1</sup>, Melinda Abas<sup>1,3</sup>, Jakub Hajný<sup>1,2</sup>, Angharad Jones<sup>4</sup>, Sascha Waidmann<sup>3</sup>, Jürgen Kleine-Vehn<sup>3</sup>, and Jiří Friml<sup>1\*</sup>

<sup>1</sup> Institute of Science and Technology Austria (IST Austria), Am Campus 1, 3400 Klosterneuburg, Austria

<sup>2</sup> Laboratory of Growth Regulators, Palacký University, Křížkovského 511/8, 771 47 Olomouc, Czech Republic

<sup>3</sup> Department of Applied Genetics and Cell Biology, University of Natural Resources and Life Sciences (BOKU), Muthgasse 18, 1190 Vienna, Austria

<sup>4</sup> Cardiff School of Biosciences, The Sir Martin Evans Building, Museum Avenue, Cardiff, CF10 3AX, United Kingdom

\*Correspondence: [jiri.friml@ist.ac.at](mailto:jiri.friml@ist.ac.at)

Fax: +43 (0)2243 9000 2000

**Supplementary Figure 1. Morphological analysis of lines expressing pin3 phospho-mutant variants.** (a) Quantification of root bending after 12 hours gravistimulation of different *d6pk* mutant and overexpression lines. (b) qPCR evaluation of PIN3 transcript levels in transformed plants (*pin3-4*). (c-g) Phenotypic analysis of PIN3 mutant variants expressing lines: root length (c); root meristem size (d); emerged lateral root number (e) and lateral root stages (f) and hypocotyl length of dark grown seedlings (g). Experiments were repeated 3 times with 10-15 roots/hypocotyls per line. Student's T-tests were calculated for the comparison of each line with the control (Col-0). Error bars represent SE, (\*  $p < 0.05$ , \*\*  $p < 0.01$ , \*\*\*  $p < 0.001$ ).

**Supplementary Figure 2. Lane profiles from anti-GFP blots and PIN3-YFP localization in hypocotyl.** (a) Lane profiles of the anti-GFP blots for different PIN3-YFP mutant variants with or without PINOID from Fig. 3a. Phosphorylation is seen as additional bump (marked by arrow) migrating slower than the main peak. PIN3-YFP before and after 4 hours of gravitropic stimulation in wild type (b); and before gravitropic stimulation in PIN3-YFP-P1A (c), PIN3-YFP-P1D (d), PIN3-YFP-P2A (e), and PIN3-YFP-P2D (f). Yellow arrows indicate gravity vector. Bars = 10  $\mu$ m.

**Supplementary Figure 3. Uncropped blots from *in vivo* phosphorylation of PIN3-YFP and mutant variants.** PIN3-YFP and mutant variants were transiently expressed in *N. benthamiana* with or without co-infiltration of PINOID. (a) Complete blots, various exposures and Ponceau stain for Figure 3a. Despite equivalent protein loading, various exposures for anti-GFP were required due to different expression levels of PIN3-YFP and mutant variants. Longer exposures were required for PIN3-YFP-P2A + PINOID and PIN3-YFP-P2D + PINOID (right hand panels, anti-GFP). Breakdown products are indicated. As *N. benthamiana* leaves contain a strong non-specific signal from anti-FLAG antibody at about 90 kD, only the lower half of the blot was used for anti-FLAG. The anti-FLAG signal for PIN3-YFP-P2D + PINOID was too weak to be detected on this blot; the same samples were re-run on a different blot (right panel, anti-FLAG). N represents carryover signal from anti-GFP (breakdown product of PIN3-YFP-P1D). (b) Complete blot and Ponceau staining of anti-GFP for Figures 3c. (c) Complete blot and Ponceau staining of Phostag gel for Figures 3d.

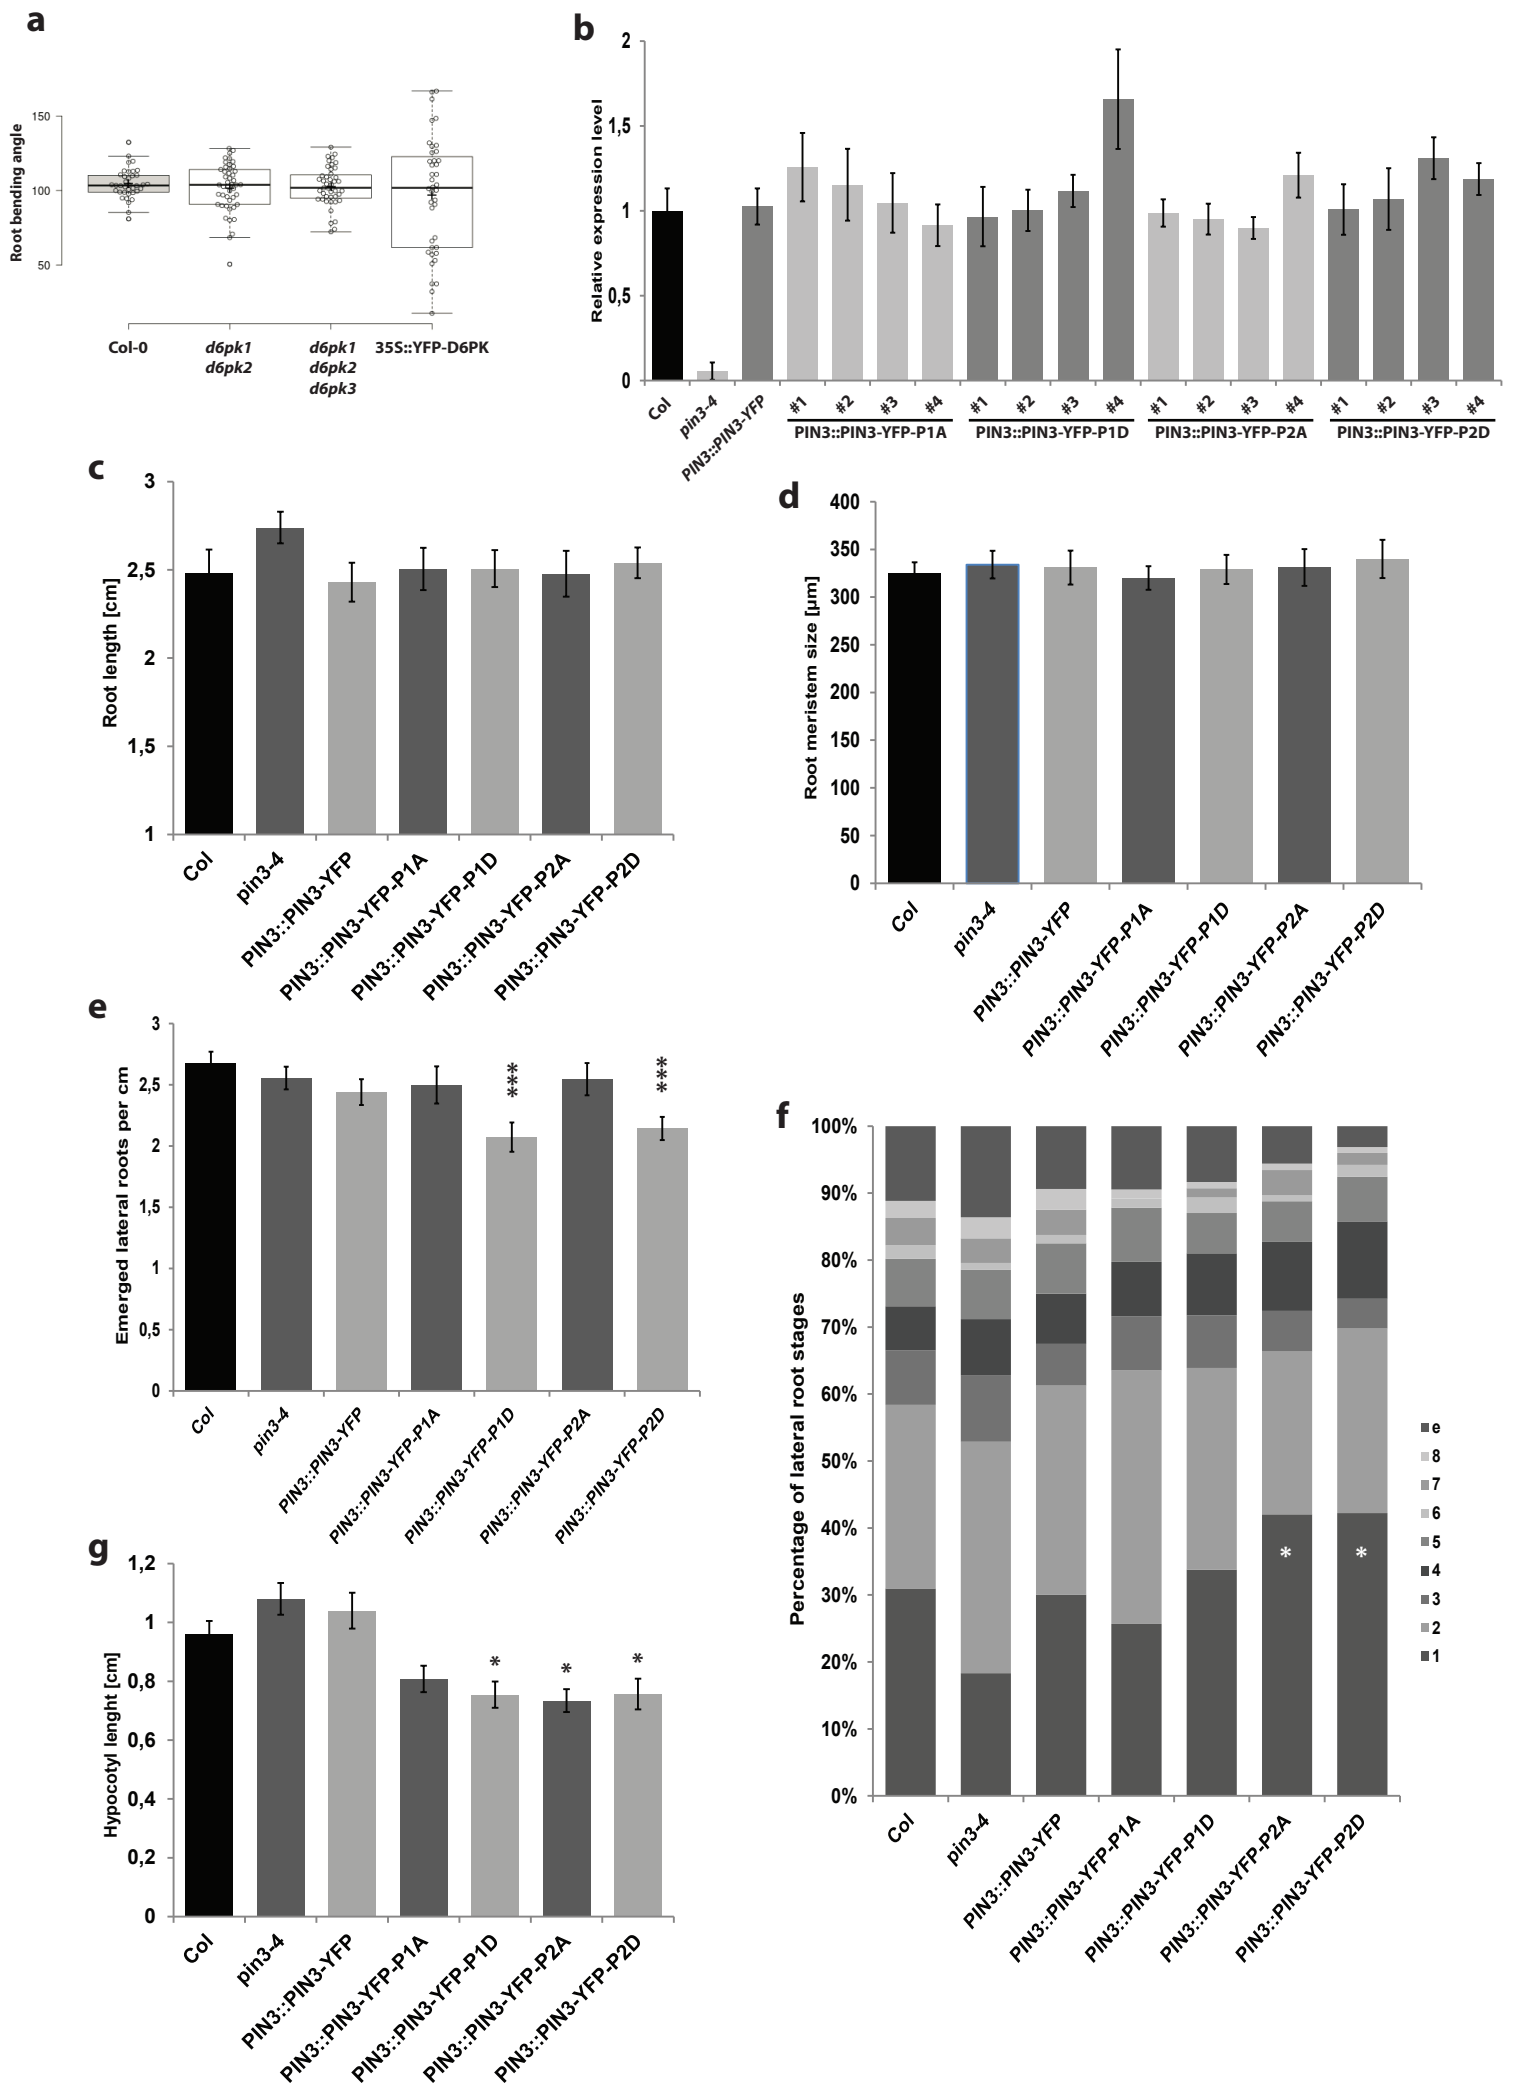

**a**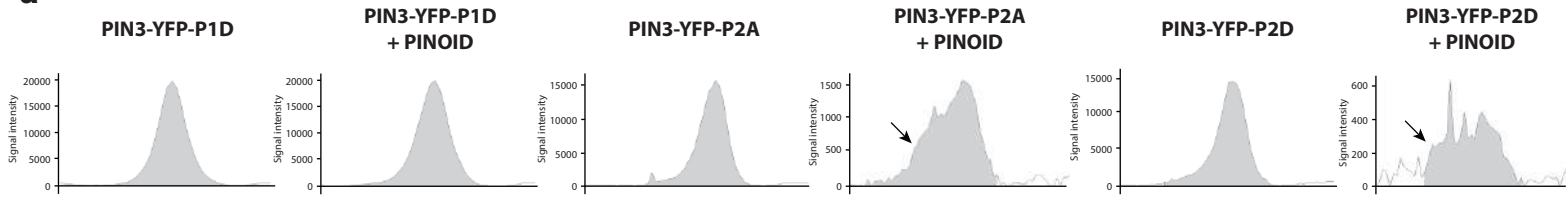**PIN3::PIN3-YFP****PIN3::PIN3-YFP-P1A****PIN3::PIN3-YFP-P1D****PIN3::PIN3-YFP-P2A****PIN3::PIN3-YFP-P2D**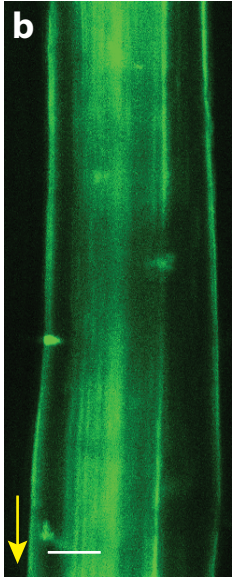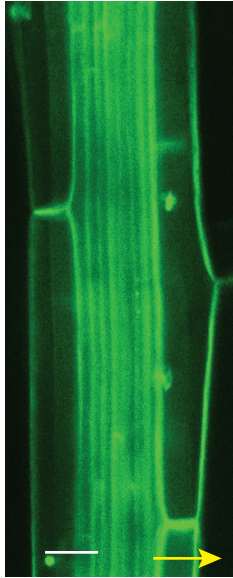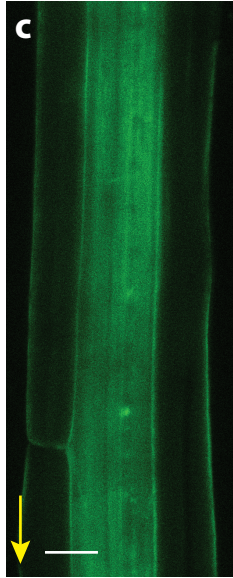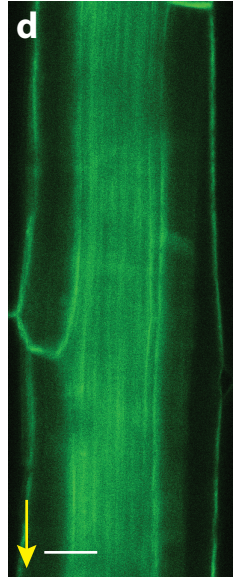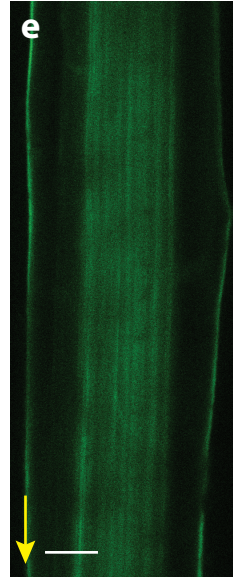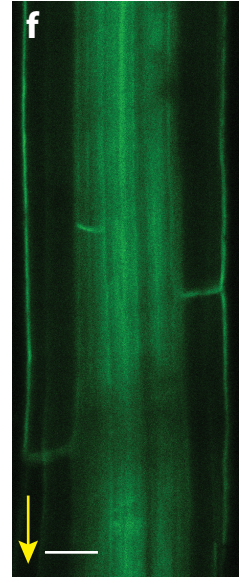

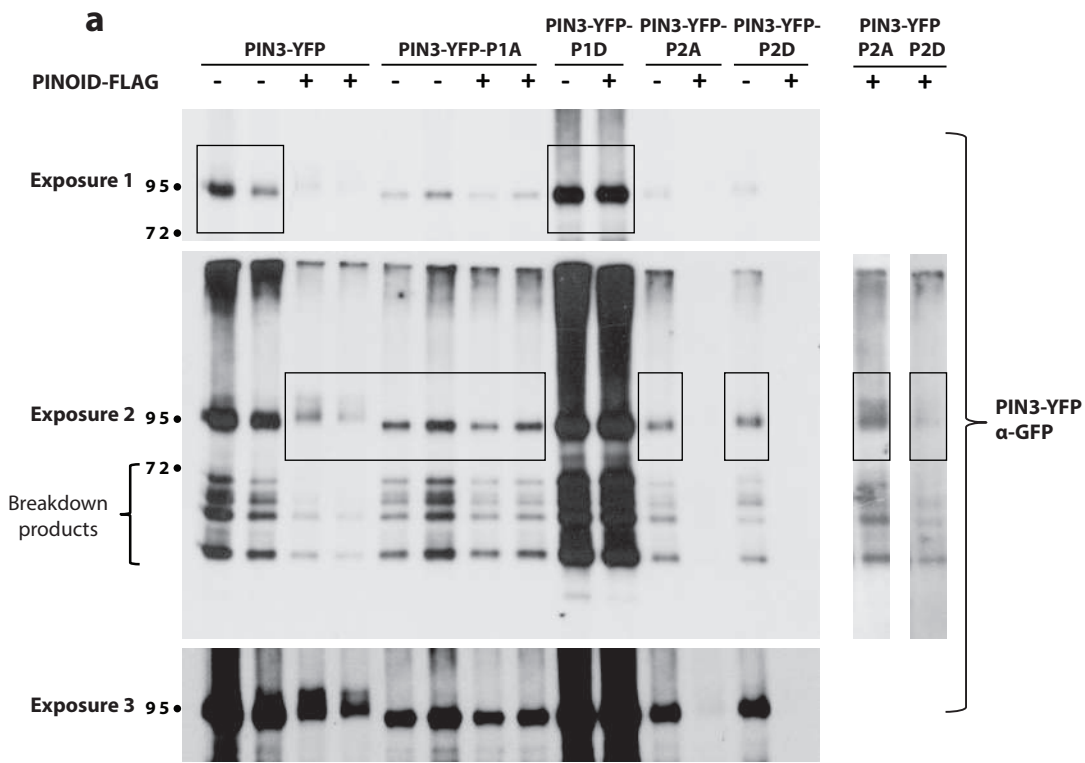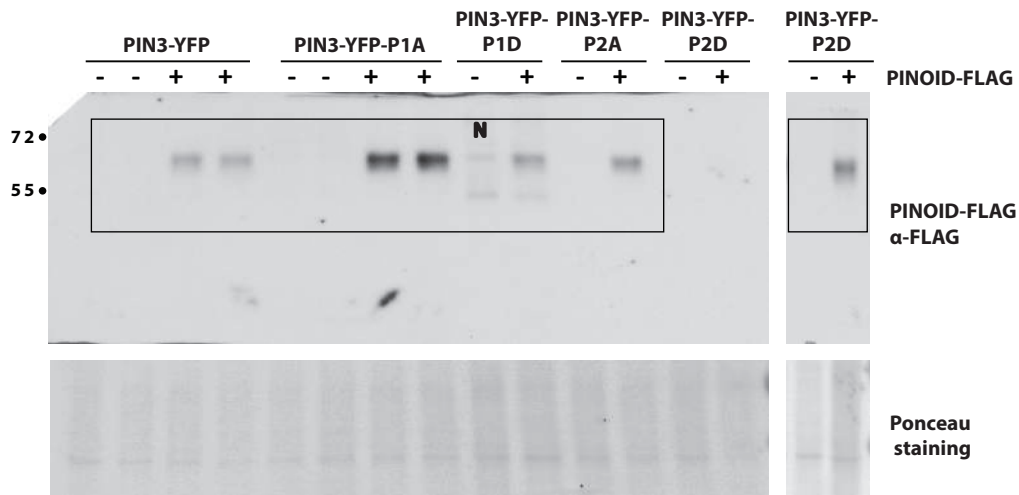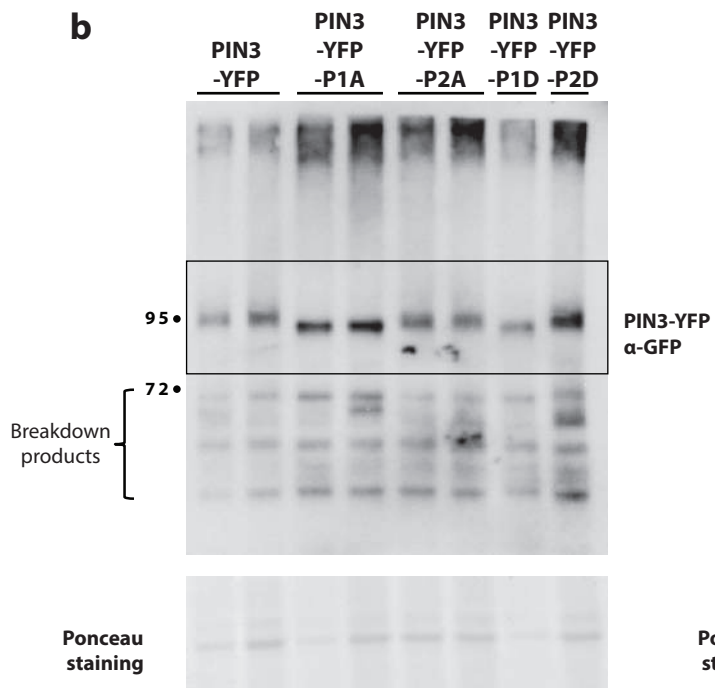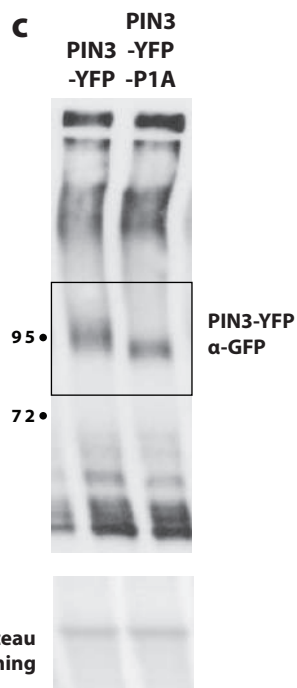

|                             |                                                                                                                                                                                                                                                                                                                                                                                                                                                                                                                                                                                                                                                                                                                                                                                                                                                                                                                                                                                                                                                                                                                                                                                                                                                                                                                                                                                                                                                                                                                                                                                                                                                                                                                                                                                                                                                                                                                                                                                                                                                                                                                                                                                                                                                                                                                |
|-----------------------------|----------------------------------------------------------------------------------------------------------------------------------------------------------------------------------------------------------------------------------------------------------------------------------------------------------------------------------------------------------------------------------------------------------------------------------------------------------------------------------------------------------------------------------------------------------------------------------------------------------------------------------------------------------------------------------------------------------------------------------------------------------------------------------------------------------------------------------------------------------------------------------------------------------------------------------------------------------------------------------------------------------------------------------------------------------------------------------------------------------------------------------------------------------------------------------------------------------------------------------------------------------------------------------------------------------------------------------------------------------------------------------------------------------------------------------------------------------------------------------------------------------------------------------------------------------------------------------------------------------------------------------------------------------------------------------------------------------------------------------------------------------------------------------------------------------------------------------------------------------------------------------------------------------------------------------------------------------------------------------------------------------------------------------------------------------------------------------------------------------------------------------------------------------------------------------------------------------------------------------------------------------------------------------------------------------------|
| <p><b>PIN3<br/>-P1A</b></p> | <p>CTCGAGTGGAGCATCACAATCTTTCCCTCTCCACTTCCCAACTCTTGTATGGGGATTCCCTCTCTTGATCGCCA<br/> TGATGGCGAATACTCTGGTCCCTCATGGTCCAATCGTCGTCTCCAGTGTATCATCTGGTACACGCTTCTCCTTTT<br/> TCTCTTCGAGTTTCGTGGCGCCAAGATGCTCATCATGGAGCAGTCCCTGAGACGGCTGCTTCCATTGTTCTTTCAA<br/> GTGGAATCCGAGTCGTTTCGCTCGACGGCCATGATTTTCTGAGACCGATGCAGAGATAGGTGACGACGGGAAGCTC<br/> ACGTCACCGTGAGAAAATCCAACGCTTACGTCGTTTCGTTCTGCGGCCGAACATGACTCCACGGCCGCAATCTCAC<br/> CGGAGCTGAGATTTATAGTCTCAGCACCCTCCTAGAGGCCTAATTTCAACCCTCTGATTTTTTACAACATGATGGGT<br/> TTCCCCGGTGGTCTCTCTCCAATTTCCGGTCCGGCGGATATGTACTCCGTTCAATCATCTAGAGGTCCAACCTCCTCGAC<br/> CTGCAAACTTCGAGGAGAATTGCGCCATGGCATCCTCCCCGAGATTCGGGTATTACCTGGAGGAGGACCGGGTCTTA<br/> TCCGGCTCCGAATCCAGAGTTCTCTTCAACCACCACATCTACCGCCAATAAAAGCGTCAATAAAAACCCGAAAGACGTT<br/> AATACGAATCAGCAGACGACTCTTCCAACGGGCGGCAAGTCAAACAGCCATGACGCCAAGGAGCTTACATGTTCTGCT<br/> GGAGCTCAAACGGGTCACCCGTTTCAGACCGGGCGGGTCTTAACGTTTTTCGGCGGAGCACCTGACAACGATCAAGGCGG<br/> AAGATCTGACCAAGGTGCTAAAGAGATCCGTATGTTAGTCCCAGATCAATCTCACAACGGCGAGACCAAAGGGGGTGGC<br/> ATGGTGAGCAAGGGCGAGGAGCTGTTACCCGGGGTGGTGCCATCTGGTTCGAGCTGGACGGCGACGTAACGGCCACA<br/> AGTTCAGCGTGTCCGGCGAGGGCGAGGGCGATGCCACCTACGGCAAGCTGACCTGAAGCTGATCTGCACCACCGGCAA<br/> GCTGCCCGTGCCCTGGCCACCCTCGTGACCACCTGGGGTACGGCCTGCAGTGCTTCGCCCGCTACCCCGACCACATG<br/> AAGCAGCAGACTTCTTCAAGTCCGCCATGCCCCAAGGCTACGTCAGGAGCGCACCATCTTCTTCAAGGACGACGGCA<br/> ACTACAAGACCCGCGCCGAGGTGAAGTTCGAGGGCGACACCTTGGTGAACCGCATCGAGCTGAAGGGCATCGACTTCAA<br/> GGAGGACGGCAACATCCTGGGGCACAAGCTGGAGTACAACATAACAGCCACAACGCTATATACCAGCCGCAAGCAG<br/> AAGAACGGCATCAAGGCCAACTTCAAGATCCGCCACAACATCGAGGACGGCGGCGTGACGCTCGCCGACCCTACCAGC<br/> AGAACACCCCCATCGGGCAGGCCCCGCTGCTGCTGCCGACAACCCTACCTGAGCTACCAGTCCGCCCTGAGCAAAGA<br/> CCCCAACGAGAAGCGCGATCACATGGTCTGCTGGAGTTCGTGACCGCCGCGGGATCACTCTCGGCATGGACGAGCTG<br/> TACAAGGGAGGTGGACCCGGTTAGCAATCTTTAGATAACTTTCTTGATAAGTCACTGCAAAATTTCTCAATTCTGTTTT<br/> GTGTGGTGAATATAGCTGTAGCTCATCCAGCAAGTGGAGATTTCCGAGGAGAACAACAATTTAGTTTCGCCGAAAAGA<br/> AGAAGAAGCAGAGACCAAAGACGCCGAGAATGGTCTAAACAAACTTGCTCCAAATTCACGGCGGGCTACAATCC<br/> AAGACAGGTCTAGGAGGAGCCGAAGCAAGTCAACGAAAAAATATGCCTCCGGCGAGTGTGATGACAAGGCTGATACTGA<br/> TAATGGTTTGGAGGAACTCATCAGAAACCAACACTTACTCTAGTCTCATTGGACTTATTTGGGCTCTCGTCGCTTT<br/> CCGTTAGTAAATCAAATTAATGTTTTCTTAACCTGAACCAACCGGT</p>     |
| <p><b>PIN3<br/>-P1D</b></p> | <p>CTCGAGTGGAGCATCACAATCTTTCCCTCTCCACTTCCCAACTCTTGTATGGGGATTCCCTCTCTTGATCGCCA<br/> TGATGGCGAATACTCTGGTCCCTCATGGTCCAATCGTCGTCTCCAGTGTATCATCTGGTACACGCTTCTCCTTTT<br/> TCTCTTCGAGTTTCGTGGCGCCAAGATGCTCATCATGGAGCAGTCCCTGAGACGGCTGCTTCCATTGTTCTTTCAA<br/> GTGGAATCCGAGTCGTTTCGCTCGACGGCCATGATTTTCTTGGAGCCGATGCAGAGATAGGTGACGACGGGAAGCTC<br/> ACGTCACCGTGAGAAAATCCAACGCTTACGTCGTTTCGTTCTGCGGCCGAACATGACTCCACGGCCGCAATCTCAC<br/> CGGAGCTGAGATTTATAGTCTCAGCACCCTCCTAGAGGCCTAATTTCAACCCTCTGATTTTTTACAACATGATGGGT<br/> TTCCCCGGTGGTCTCTCTCCAATTTCCGGTCCGGCGGATATGTACTCCGTTCAATCATCTAGAGGTCCAACCTCCTCGAC<br/> CTGATAAACTTCGAGGAGAATTGCGCCATGGCATCCTCCCCGAGATTCGGGTATTACCTGGAGGAGGACCGGGTCTTA<br/> TCCGGCTCCGAATCCAGAGTTCTCTTCAACCACCACATCTACCGCCAATAAAAGCGTCAATAAAAACCCGAAAGACGTT<br/> AATACGAATCAGCAGACGACTCTTCCAACGGGCGGCAAGTCAAACAGCCATGACGCCAAGGAGCTTACATGTTCTGCT<br/> GGAGCTCAAACGGGTCACCCGTTTCAGACCGGGCGGGTCTTAACGTTTTTCGGCGGAGCACCTGACAACGATCAAGGCGG<br/> AAGATCTGACCAAGGTGCTAAAGAGATCCGTATGTTAGTCCCAGATCAATCTCACAACGGCGAGACCAAAGGGGGTGGC<br/> ATGGTGAGCAAGGGCGAGGAGCTGTTACCCGGGGTGGTGCCATCTGGTTCGAGCTGGACGGCGACGTAACGGCCACA<br/> AGTTCAGCGTGTCCGGCGAGGGCGAGGGCGATGCCACCTACGGCAAGCTGACCTGAAGCTGATCTGCACCACCGGCAA<br/> GCTGCCCGTGCCCTGGCCACCCTCGTGACCACCTGGGGTACGGCCTGCAGTGCTTCGCCCGCTACCCCGACCACATG<br/> AAGCAGCAGACTTCTTCAAGTCCGCCATGCCCCAAGGCTACGTCAGGAGCGCACCATCTTCTTCAAGGACGACGGCA<br/> ACTACAAGACCCGCGCCGAGGTGAAGTTCGAGGGCGACACCTTGGTGAACCGCATCGAGCTGAAGGGCATCGACTTCAA<br/> GGAGGACGGCAACATCCTGGGGCACAAGCTGGAGTACAACATAACAGCCACAACGCTATATACCAGCCGCAAGCAG<br/> AAGAACGGCATCAAGGCCAACTTCAAGATCCGCCACAACATCGAGGACGGCGGCGTGACGCTCGCCGACCCTACCAGC<br/> AGAACACCCCCATCGGGCAGGCCCCGCTGCTGCTGCCGACAACCCTACCTGAGCTACCAGTCCGCCCTGAGCAAAGA<br/> CCCCAACGAGAAGCGCGATCACATGGTCTGCTGGAGTTCGTGACCGCCGCGGGATCACTCTCGGCATGGACGAGCTG<br/> TACAAGGGAGGTGGACCCGGTTAGCAATCTTTAGATAACTTTCTTGATAAGTCACTGCAAAATTTCTCAATTCTGTTTT<br/> GTGTGGTGAATATAGCTGTAGCTCATCCAGCAAGTGGAGATTTCCGAGGAGAACAACAATTTAGTTTCGCCGAAAAGA<br/> AGAAGAAGCAGAGAGACCAAAGACGCCGAGAATGGTCTAAACAAACTTGCTCCAAATTCACGGCGGGCTACAATCC<br/> AAGACAGGTCTAGGAGGAGCCGAAGCAAGTCAACGAAAAAATATGCCTCCGGCGAGTGTGATGACAAGGCTGATACTGA<br/> TAATGGTTTGGAGGAACTCATCAGAAACCAACACTTACTCTAGTCTCATTGGACTTATTTGGGCTCTCGTCGCTTT<br/> CCGTTAGTAAATCAAATTAATGTTTTCTTAACCTGAACCAACCGGT</p> |

|                             |                                                                                                                                                                                                                                                                                                                                                                                                                                                                                                                                                                                                                                                                                                                                                                                                                                                                                                                                                                                                                                                                                                                                                                                                                                                                                                                                                                                                                                                                                                                                                                                                                                                                                                                                                                                                                                                                                                                                                                                                                                                                                                                                                                                                                                                                                                                                     |
|-----------------------------|-------------------------------------------------------------------------------------------------------------------------------------------------------------------------------------------------------------------------------------------------------------------------------------------------------------------------------------------------------------------------------------------------------------------------------------------------------------------------------------------------------------------------------------------------------------------------------------------------------------------------------------------------------------------------------------------------------------------------------------------------------------------------------------------------------------------------------------------------------------------------------------------------------------------------------------------------------------------------------------------------------------------------------------------------------------------------------------------------------------------------------------------------------------------------------------------------------------------------------------------------------------------------------------------------------------------------------------------------------------------------------------------------------------------------------------------------------------------------------------------------------------------------------------------------------------------------------------------------------------------------------------------------------------------------------------------------------------------------------------------------------------------------------------------------------------------------------------------------------------------------------------------------------------------------------------------------------------------------------------------------------------------------------------------------------------------------------------------------------------------------------------------------------------------------------------------------------------------------------------------------------------------------------------------------------------------------------------|
| <p><b>PIN3<br/>-P2A</b></p> | <p>CTCGAGTGGAGCATCACAATCTTTTCCCTCTCCACTTCCCAACTCTTGTATGGGGATTCCCTCTCTTGATCGCCA<br/> TGATGGCGAATACTCTGGTCCCTCATGGTCCAATCGTCGTCTCCAGTGTATCATCTGGTACACGCTTCTCCTTTT<br/> TCTCTTCGAGTTTCGTGGCGCCAAGATGCTCATCATGGAGCAGTCCCTGAGACGGCTGCTTCCATTGTTCTTTCAA<br/> GTGCAATCCGACGTCGTTTCGCTCGACGGCCATGATTTTCTTGAGACCGATGCAGAGATAGGTGACGCGGAAGCTC<br/> ACGTCAACCGTGAGAAAATCCAACGCTTACGTCGTTTCGTTCTGCGGCCGAACATGACTCCACGGCCGTCAAATCTCAC<br/> CGGAGCTGAGATTTATAGTCTCAGCACCCTCCTAGAGGCTCTAATTTCAACCCTCTGATTTTTTACAACATGATGGGT<br/> TTCCCCGGTGGTCTCTCTCCAATTTCCGGTCCGGCGGATATGTACTCCGTTCAATCATCTAGAGGTCCAACCTCCTCGAC<br/> CTTCAAACCTTCGAGGAGAATTGCGCCATGGCATCCTCCCGGAGATTCGGGTATTACCTGGAGGAGGACCGGGTCTTA<br/> TCCGGCTCCGAATCCAGAGTTC<b>GCTGCA</b>ACCACCACA<b>GCT</b>ACCGCCAATAAAAGCGTCAATAAAAACCCGAAAGACGTT<br/> AATACGAATCAGCAGACGACTCTTCCAACGGGCGGCAAGTCAAACAGCCATGACGCCAAGGAGCTTACATGTTTCGTT<br/> GGAGCTCAAACGGGTCACCCGTTTCAGACCGGGCGGGTCTTAACGTTTTCGGCGGAGCACCTGACAACGATCAAGGCGG<br/> AAGATCTGACCAAGGTGCTAAAGAGATCCGATGTTAGTCCCAGATCAATCTCACAACGGCGAGACCAAAGGGGGTGGC<br/> ATGGTGAGCAAGGGCGAGGAGCTGTTACCCGGGGTGGTGCCATCTGGTTCGAGCTGGACGGCGACGTAACGGCCACA<br/> AGTTCAGCGTGTCCGGCGAGGGCGAGGGCGATGCCACCTACGGCAAGCTGACCCGAAAGCTGATCTGCACCACCGGCAA<br/> GCTGCCCGTGCCCTGGCCACCCTCGTGACCACCTGGGGTACGGCCTGCAGTGCTTCGCCCGCTACCCCGACCACATG<br/> AAGCAGCAGACTTCTTCAAGTCCGCCATGCCCCAAGGCTACGTCAGGAGCGCACCATCTTCTTCAAGGACGACGGCA<br/> ACTACAAGACCCGCGCCGAGGTGAAGTTCGAGGGCGACACCCTGGTGAACCGCATCGAGCTGAAGGGCATCGACTTCAA<br/> GGAGGACGGCAACATCCTGGGGCACAAGCTGGAGTACAACATAACAGCCACAACGCTATATACCCGCCGACAAGCAG<br/> AAGAACGGCATCAAGGCCAACTTCAAGATCCGCCACAACATCGAGGACGGCGGCGTGACGCTCGCCGACCCTACCAGC<br/> AGAACACCCCCATCGGGCAGGCCCCGCTGCTGCTGCCGACAACCACTACCTGAGCTACCAGTCCGCCCTGAGCAAAGA<br/> CCCCAACGAGAAGCGCGATCACATGGTCTGCTGGAGTTCGTGACCGCCGCGGGATCACTCTCGGCATGGACGAGCTG<br/> TACAAGGGAGGTGGACCCGGTTAGCAATCTTTAGATAACTTTCTTGATAAGTCACTGCAAAATTTCTCAATTCTGTTTT<br/> GTGTGGTGAATATAGCTGTAGCTCATCCAGCAAGTGGAGATTTTCGAGGAGAAACAACAATTTAGTTTCGCCGAAAAGA<br/> AGAAGAAGCAGAGACCAAAGACGCCGAGAATGGTCTAAACAAACTTGCTCCAAATTCACGGCGGCGCTACAATCC<br/> AAGACAGGTCTAGGAGGAGCCGAAGCAAGTCAACGAAAAATATGCCTCCGGCGAGTGTGATGACAAGGCTGATACTGA<br/> TAATGGTTTGGAGGAACTCATCAGAAACCAACACTTACTCTAGTCTCATTGGACTTATTTGGGCTCTCGTCGCTTT<br/> CCGGTTAGTAAATCAAATTAATGTTTTCTTAACCGAACCAACCGGTT</p>   |
| <p><b>PIN3<br/>-P2D</b></p> | <p>CTCGAGTGGAGCATCACAATCTTTTCCCTCTCCACTTCCCAACTCTTGTATGGGGATTCCCTCTCTTGATCGCCA<br/> TGATGGCGAATACTCTGGTCCCTCATGGTCCAATCGTCGTCTCCAGTGTATCATCTGGTACACGCTTCTCCTTTT<br/> TCTCTTCGAGTTTCGTGGCGCCAAGATGCTCATCATGGAGCAGTCCCTGAGACGGCTGCTTCCATTGTTCTTTCAA<br/> GTGCAATCCGACGTCGTTTCGCTCGACGGCCATGATTTTCTTGAGACCGATGCAGAGATAGGTGACGCGGAAGCTC<br/> ACGTCAACCGTGAGAAAATCCAACGCTTACGTCGTTTCGTTCTGCGGCCGAACATGACTCCACGGCCGTCAAATCTCAC<br/> CGGAGCTGAGATTTATAGTCTCAGCACCCTCCTAGAGGCTCTAATTTCAACCCTCTGATTTTTTACAACATGATGGGT<br/> TTCCCCGGTGGTCTCTCTCCAATTTCCGGTCCGGCGGATATGTACTCCGTTCAATCATCTAGAGGTCCAACCTCCTCGAC<br/> CTTCAAACCTTCGAGGAGAATTGCGCCATGGCATCCTCCCGGAGATTCGGGTATTACCTGGAGGAGGACCGGGTCTTA<br/> TCCGGCTCCGAATCCAGAGTTC<b>GATGAT</b>ACCACCACA<b>GAT</b>ACCGCCAATAAAAGCGTCAATAAAAACCCGAAAGACGTT<br/> AATACGAATCAGCAGACGACTCTTCCAACGGGCGGCAAGTCAAACAGCCATGACGCCAAGGAGCTTACATGTTTCGTT<br/> GGAGCTCAAACGGGTCACCCGTTTCAGACCGGGCGGGTCTTAACGTTTTCGGCGGAGCACCTGACAACGATCAAGGCGG<br/> AAGATCTGACCAAGGTGCTAAAGAGATCCGATGTTAGTCCCAGATCAATCTCACAACGGCGAGACCAAAGGGGGTGGC<br/> ATGGTGAGCAAGGGCGAGGAGCTGTTACCCGGGGTGGTGCCATCTGGTTCGAGCTGGACGGCGACGTAACGGCCACA<br/> AGTTCAGCGTGTCCGGCGAGGGCGAGGGCGATGCCACCTACGGCAAGCTGACCCGAAAGCTGATCTGCACCACCGGCAA<br/> GCTGCCCGTGCCCTGGCCACCCTCGTGACCACCTGGGGTACGGCCTGCAGTGCTTCGCCCGCTACCCCGACCACATG<br/> AAGCAGCAGACTTCTTCAAGTCCGCCATGCCCCAAGGCTACGTCAGGAGCGCACCATCTTCTTCAAGGACGACGGCA<br/> ACTACAAGACCCGCGCCGAGGTGAAGTTCGAGGGCGACACCCTGGTGAACCGCATCGAGCTGAAGGGCATCGACTTCAA<br/> GGAGGACGGCAACATCCTGGGGCACAAGCTGGAGTACAACATAACAGCCACAACGCTATATACCCGCCGACAAGCAG<br/> AAGAACGGCATCAAGGCCAACTTCAAGATCCGCCACAACATCGAGGACGGCGGCGTGACGCTCGCCGACCCTACCAGC<br/> AGAACACCCCCATCGGGCAGGCCCCGCTGCTGCTGCCGACAACCACTACCTGAGCTACCAGTCCGCCCTGAGCAAAGA<br/> CCCCAACGAGAAGCGCGATCACATGGTCTGCTGGAGTTCGTGACCGCCGCGGGATCACTCTCGGCATGGACGAGCTG<br/> TACAAGGGAGGTGGACCCGGTTAGCAATCTTTAGATAACTTTCTTGATAAGTCACTGCAAAATTTCTCAATTCTGTTTT<br/> GTGTGGTGAATATAGCTGTAGCTCATCCAGCAAGTGGAGATTTTCGAGGAGAAACAACAATTTAGTTTCGCCGAAAAGA<br/> AGAAGAAGCAGAGAGACCAAAGACGCCGAGAATGGTCTAAACAAACTTGCTCCAAATTCACGGCGGCGCTACAATCC<br/> AAGACAGGTCTAGGAGGAGCCGAAGCAAGTCAACGAAAAATATGCCTCCGGCGAGTGTGATGACAAGGCTGATACTGA<br/> TAATGGTTTGGAGGAACTCATCAGAAACCAACACTTACTCTAGTCTCATTGGACTTATTTGGGCTCTCGTCGCTTT<br/> CCGGTTAGTAAATCAAATTAATGTTTTCTTAACCGAACCAACCGGTT</p> |

**Table S1. Sequences of synthesized fragments containing the PIN3 phosphorylation mutations.**
